# Supplementary material for: Continuous flow synthesis of β-hydroxyethyl hydrazine in microreactors: process behavior and impurity formation mechanism
Source: Royal Society of Chemistry journal article supplement (doi:10.1039/d3re00702b), 2024-01-01
Supplement: d3re00702b1.pdf [file d3re00702b1.pdf]

## Supporting Information

### Continuous flow synthesis of $\beta$ -hydroxyethyl hydrazine in microreactors: Process behavior and impurities formation mechanism

Haiyun Ma<sup>a,b</sup>, Chaoqun Yao<sup>a</sup>, Fengjun Jiao<sup>a</sup>, Shuainan Zhao<sup>a</sup>, Guangwen Chen<sup>a,b,\*</sup>

<sup>a</sup> Dalian Institute of Chemical Physics, Chinese Academy of Sciences, Dalian 116023, China

<sup>b</sup> University of Chinese Academy of Sciences, Beijing 100049, China

\* Corresponding author: Guangwen Chen

Tel.: +86-411-8437-9031, Fax.: +86-411-8469-1570

*E-mail address:* [gwchen@dicp.ac.cn](mailto:gwchen@dicp.ac.cn) (G.W. Chen), ORCID Guangwen Chen: 0000-0001-5290-7921

**Table S1.** MS characterization data of products.

| Abbr.                                | Retention time |       | MS main<br>fragments (m/z)                                    | Formula                                                                               |
|--------------------------------------|----------------|-------|---------------------------------------------------------------|---------------------------------------------------------------------------------------|
|                                      | (min)          |       |                                                               |                                                                                       |
|                                      | GC             | GC/MS |                                                               |                                                                                       |
| Ethanolamine                         | 1.31           | 1.323 | 61 (M <sup>+</sup> ), 42,<br>30, 28.                          | 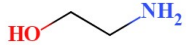   |
| Diethanolamine                       | 2.238          | 2.238 | 74 (M <sup>+</sup> ), 56,<br>45, 42, 30, 28.                  |    |
| Triethanolamine                      | 3.417          | 3.402 | 118 (M <sup>+</sup> ), 88,<br>74, 56, 45, 30.                 |    |
| Hydroxyethyl hydrazine               | 1.527          | 1.501 | 76 (M <sup>+</sup> ), 57,<br>45, 43, 31, 30,<br>28.           |  |
| 1,2-Bis(β-hydroxyethyl)<br>hydrazine | 2.543          | 2.438 | 120 (M <sup>+</sup> ), 89,<br>71, 45, 42, 30,<br>28.          |  |
| 1,1-Bis(β-hydroxyethyl)<br>hydrazine | 2.727          | 2.817 | 120 (M <sup>+</sup> ), 89,<br>71, 45, 30, 28.                 |  |
| Tri(β-<br>hydroxyethyl)hydrazine     | 3.863          | 3.858 | 164 (M <sup>+</sup> ), 133,<br>89, 74, 56, 45,<br>42, 30, 28. |  |

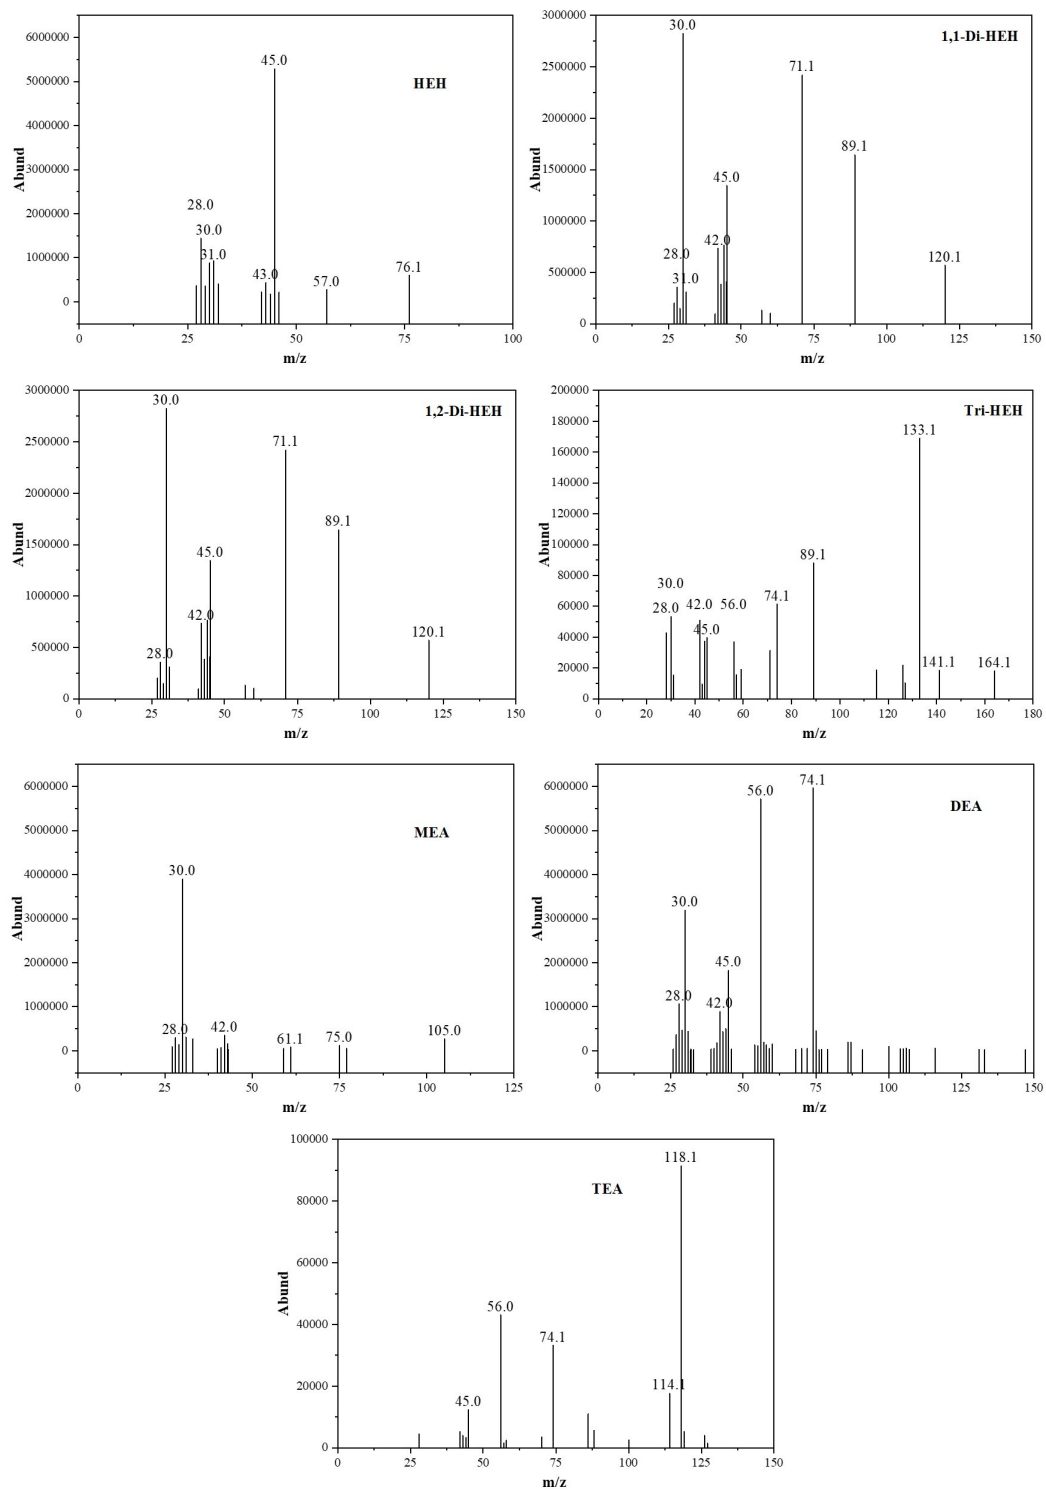

Figure S1. Mass spectrogram of the products.

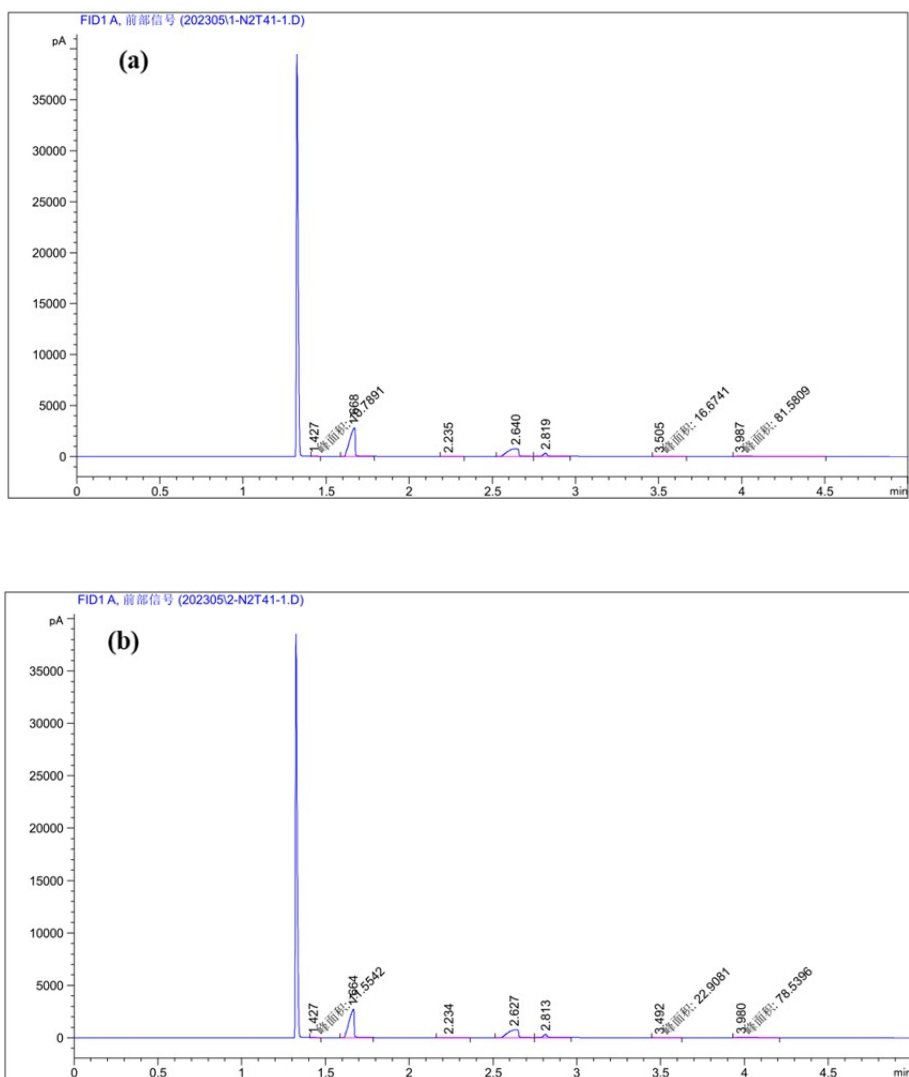

**Figure S2.** Gas chromatogram of the products.

Run conditions: (a)  $\text{N}_2\text{H}_4 \cdot \text{H}_2\text{O}/\text{EO} = 2.0$ ,  $[\text{N}_2\text{H}_4 \cdot \text{H}_2\text{O}]$  80 wt.%, 70 °C, 0.2 MPa. (b)

$\text{N}_2\text{H}_4 \cdot \text{H}_2\text{O}/\text{EO} = 2.0$ ,  $[\text{N}_2\text{H}_4 \cdot \text{H}_2\text{O}]$  80 wt.%, 70 °C, 0.3 MPa,  $t = 0.69$  min.

Figure S2 shows the results of a certain sample in the given conditions. Gas chromatograms clearly showed the existence of MEA, DEA, TEA, HEH, 1,2-Di-HEH, 1,1-Di-HEH and Tri-HEH.

Table S2. The vapor pressure of NH<sub>3</sub> under different temperatures.

| Temperature /°C | Pressure /MPa | Temperature /°C | Pressure /MPa |
|-----------------|---------------|-----------------|---------------|
| 0               | 0.43          | 10              | 0.61          |
| 20              | 0.85          | 30              | 1.16          |
| 40              | 1.55          | 50              | 2.03          |
| 60              | 2.61          | 70              | 3.32          |
| 80              | 4.16          | 90              | 5.14          |

Table S3. The vapor pressure of EO under different temperatures.

| Temperature/°C | Pressure/kPa | Temperature/°C | Pressure/kPa |
|----------------|--------------|----------------|--------------|
| 0              | 67.23        | 10             | 101.69       |
| 20             | 149.07       | 30             | 212.50       |
| 40             | 289.28       | 50             | 392.53       |
| 60             | 521.93       | 70             | 681.21       |
| 80             | 874.44       | 90             | 1105.46      |

### Comparison of addition reaction in the microreactor and in a batch reactor

Utilizing the optimized process conditions obtained in the microreactor, we conducted a comparison between the microreactor and the semi-batch reactor. Table S4 displays that the microreactor achieved a 95% HEH yield in 0.7 min, while the batch reactor only achieved 43% in 10 min. The superior performance of the microreactor system for addition reaction could be attributed to the enhanced gas-liquid mass transfer efficiency. Additionally, Table S4 provides several examples on HEH production. In the process developed by Olin Corporation, a raw material ratio (N<sub>2</sub>H<sub>4</sub>·H<sub>2</sub>O/EO) of 12:1 is employed, and the content of HEH in the crude product can reach 90%, although the yield is not mentioned. In the study of Zhu et al., an HEH yield of 89% was achieved by using magnetic stirrers to enhance the gas-liquid reaction. It is worth noting that the HEH synthesis process in the semi-batch reactor is achieved by introducing ethylene oxide

(EO) gas into hydrazine hydrate. A slower rate of ethylene oxide (EO) feed was necessary to enhance the selectivity of HEH, but it also considerably extended the reaction time. Therefore, compared to batch reactors, microreactors exhibit significantly enhanced reaction efficiency, with notable enhancements observed not only in yield but also in space-time yield.

Table S4. The HEH synthesis in different reactors.

| Reactor<br>Type       | Volume<br>mL   | N <sub>2</sub> H <sub>4</sub> ·H <sub>2</sub> O/EO<br>/ | Times<br>min   | Temperatur | Yield<br>%     | Reference                        |
|-----------------------|----------------|---------------------------------------------------------|----------------|------------|----------------|----------------------------------|
|                       |                |                                                         |                | e<br>°C    |                |                                  |
| 1 Microreactor        | 12             | 12                                                      | 0.7            | 70         | 95.0           | This work                        |
| 2 Three-neck<br>flask | 200            | 10                                                      | 10             | 70         | 43.0           | Self-<br>experiment              |
| 3 Tube reactor        | — <sup>a</sup> | 12                                                      | — <sup>a</sup> | 70         | — <sup>a</sup> | Olin<br>Corporation <sup>1</sup> |
| 4 Three-neck<br>flask | 2000           | 10                                                      | — <sup>a</sup> | 70         | 89.0           | Zhu et al. <sup>2</sup>          |

a: not mentioned in the text.

1. Olin Corporation, *US Patent 5 433 802*, 1995.
2. Y. F. Zhu, H. S. Tian and H. L. Pan, *Shanghai Chemical Industry (In Chinese)*, 2001, 23, 13-15.
